# Supplementary material
Source: publisher site journal article supplement (https://www.dovepress.com/article/609130)
Supplement: Supplementary file 1 [file 609130%20Supplementary%20Materials.docx]

**Table S1**: **Characteristics of Critically Ill Cancer Patients with Grade 4 irAEs**

|  | All irAEs（n=26） | Survivors（n=13） | Non-Survivors（n=13） | *p* |
| --- | --- | --- | --- | --- |
| **Demographics and anamnesis** |  |  |  |  |
| Sex=M (n, %) | 19(73.1%) | 7(53.85%) | 12(92.31%) | **0.027** |
| Sex=F (n, %) | 7(26.9%) | 6(46.15%) | 1(7.69%) | **0.027** |
| Age (years, ±s) | 62.50±9.54 | 59.77±10.97 | 65.23±7.293 | 0.148 |
| **Anamnesis** |  |  |  |  |
| Hypertension (n, %) | 10(38.5%) | 5(38.46%) | 5(38.46%) | 1.000 |
| Allergy (n, %) | 4(15.4%) | 2(15.38%) | 2(15.38%) | 0.93 |
| Organ diseases | 17(65.38%) | 5(38.46%) | 11(84.62%) | 0.583 |
| Smoking (n, %) | 10(38.5%) | 3(23.08%) | 7(53.85%) | 0.107 |
| Drinking (n, %) | 6(23.1%) | 3(23.08%) | 3(23.08%) | 1.000 |
| BMI (kg/m2, ±s) | 23.56±3.61 | 25.06±4.17 | 22.05±2.20 | **0.030** |
| **Primary tumor distribution** |  |  |  |  |
| Primary tumor site |  |  |  |  |
| Digestive tract (n, %) | 16(61.54%) | 7(96.3%) | 9(96.3%) | 0.089 |
| Non-digestive tract (n, %) | 10(96.3%) | 6(96.3%) | 4(96.3%) | 0.619 |
| Medical treatment of tumor |  |  |  |  |
| Chemotherapy (n, %) | 24(96.3%) | 11(84.62%) | 13(100.00%) | 0.141 |
| Radiotherapy (n, %) | 9(34.6%) | 3(23.08%) | 6(46.15%) | 0.216 |
| Targeted therapy (n, %) | 8(30.8%) | 6(46.15%) | 2(15.38%) | 0.089 |
| Anthracyclines (n, %) | 22(84.62%) | 13(100%) | 9(69.23%) | 0.092 |
| VEGF-inhibitors (n, %) | 9(34.62%) | 7(53.85%) | 2(15.38%) | **0.039** |
| Pathological state |  |  |  |  |
| Squamous carcinoma (n, %) | 12(46.15%) | 8(61.54%) | 4(30.77%) | **0.047** |
| Adenocarcinoma (n, %) | 6(23.08%) | 1(7.69%) | 5(38.46%) | 0.063 |
| Undefined (n, %) | 8(30.77%) | 3(23.08%) | 5(38.46%) | 0.395 |
| Surgical operation condition |  |  |  |  |
| Surgical completed (n, %)  (n, %) | 2(7.7%) | 1(7.69%) | 1(7.69%) | 1.000 |
| No surgical experience (n, %) | 15(57.7%) | 10(76.92%) | 5(38.46%) | **0.047** |
| Postoperative (n, %) | 9(34.6%) | 2(15.38%) | 7(53.85%) | **0.039** |
| **ICI treatment patterns** |  |  |  |  |
| N1 [times，M(Q1,Q3)] | 2[1-3] | 2[1.5-3] | 2[1-3] | 0.801 |
| T1 [d, M (Q1, Q3)] | 49.5[30-105] | 47[28-81] | 91[30-105] | 0.511 |
| T2 [d, M (Q1, Q3)] | 53[34.5-105] | 52[30-100.5] | 91[35-105] | 0.448 |
| T3 [d, M (Q1, Q3)] | 25[19.25-55] | 23[13-43] | 31[23-72] | 0.186 |
| **Organ-specific irAEs** |  |  |  |  |
| Pneumonia (n, %) | 10(38.46%) | 1(7.69%) | 9(69.23%) | **0.001** |
| Myocarditis (n, %)  Kidney | 8(30.8%) | 5(38.46%) | 3(23.08%) | 0.395 |
| Dermatologic toxicities (n, %) | 5(19.2%) | 4(38.46%) | 1(7.69%) | 0.135 |
| Others (n, %) | 3(61.54%) | 3(92.31%) | 0(30.77%) | 0.408 |

**Note:** Bold p‑values indicate statistically significant differences between groups (p<0.05).

**Abbreviations:** BMI: Body mass index; N1: Number of ICI applications before transferring to ICU; T1: Time from first dose ICI to irAEs; T2：Time from first dose ICI to ICU; T3: Time from last dose ICI to ICU; ICI: Immune checkpoint inhibitors.

**Table S2: Clinical and Biological Characteristics of Grade 4 irAEs at ICU**

|  | All irAEs（n=26） | Survivors（n=13） | Non-Survivors（n=13） | *p* |
| --- | --- | --- | --- | --- |
| **Reason for being transferred to the ICU** |  |  |  |  |
| Acute respiratory failure to ICU (n, %) | 14(53.85%) | 10(76.92%) | 4(30.77%) | **0.014** |
| Other reason to ICU (n, %) | 12(46.15%) | 2(15.38%) | 10(76.92%) | **0.002** |
| **Vital signs** |  |  |  |  |
| SBP [mmHg, M (Q1, Q3)] | 135.5[119.75-152.5] | 135[123.5-168] | 136[107-147.5] | 0.479 |
| DBP [mmHg, M (Q1, Q3)] | 75.5[60-82.25] | 79[72.5-87] | 62[58-77] | **0.014** |
| HR [time per minute, M (Q1, Q3)] | 103.5[88.75-118.5] | 96[82-120.5] | 106[92-116.5] | 0.650 |
| Core temperature [℃, M (Q1, Q3)] | 36.5[36-38.68] | 36.5[36-38.7] | 36.1[35.75-38.8] | 0.614 |
| SpO2 [%, M (Q1, Q3)] | 79.5[50.75-90.75] | 88[74-96.5] | 52[47.5-86.5] | 0.311 |
| **Arterial blood gas analysis** |  |  |  |  |
| pH [M (Q1, Q3)] | 7.36[7.34-7.46] | 7.41[7.31-7.48] | 7.35[7.33-7.41] | **0.029** |
| PCO2 [mmHg, M (Q1, Q3)] | 36.8[32.65-50.75] | 36.3[33.2-39.7] | 43.55[30.6-53.9] | 0.205 |
| PO2 [mmHg, M (Q1, Q3)] | 77[56.5-97.5] | 90[62.5-111] | 70.5[53-82.5] | 0.406 |
| BE [mmol/L, M (Q1, Q3)] | -2.5[-4.75-2.5] | -4[-4.5-1] | 1[-8-4] | 0.137 |
| **Complete blood count** |  |  |  |  |
| Hemoglobin [g/L, M (Q1, Q3)] | 109[98-120.5] | 109[100.5-122] | 109[89-118] | 0.336 |
| Leucocytes [109/L, M (Q1, Q3)] | 11.32[5.03-16.79] | 6.76[4.31-13.1] | 14.96[6.62-17.36] | 0.113 |
| N% [%, M (Q1, Q3)] | 89.35[82.58-94.78] | 84.9[75.5-90.65] | 93.8[89.3-96.15] | **0.009** |
| Neutrophils [109/L, M (Q1, Q3)] | 9.27[4.21-15.87] | 5.67[3.4-11.52] | 13.99[6.38-16.19] | 0.091 |
| Eosinophils [109/L, M (Q1, Q3)] | 0[0-0.02] | 0[0-0.01] | 0[0-0.04] | 0.511 |
| Basophil [109/L, M (Q1, Q3)] | 0.02[0.01-0.03] | 0.01[0.01-0.07] | 0.02[0.01-0.03] | 0.614 |
| **Infection biomarkers** |  |  |  |  |
| PCT at d1 [ng/ml, M (Q1, Q3)] | 0.42[0.11-2.64] | 0.22[0.08-1.96] | 0.74[0.21-4.23] | 0.243 |
| PCT at d2 [ng/ml, M (Q1, Q3)] | 0.63[0.07-3.88] | 0.3[0.06-2.21] | 0.88[0.42-8.34] | 0.113 |
| CRP [mg/ml, M (Q1, Q3)] | 32.33[10.64-103.35] | 32.33[11.66-76.66] | 44.46[6.06-130.92] | 0.894 |
| Ferritin [µg/ml, M (Q1, Q3)] | 847.85[391.1-2580.2] | 620.8[165.25-2382] | 1095[605.35-2731] | 0.362 |
| **Tissue perfusion markers** |  |  |  |  |
| LAC at d1[mmol/L, M (Q1, Q3)] | 2[1.68-4.23] | 1.7[1.05-2.2] | 2.5[1.9-5.35] | **0.006** |
| LAC at d2[mmol/L, M (Q1, Q3)] | 1.8[1.48-2.48] | 1.5[1.25-1.95] | 2[1.8-4.2] | **0.007** |
| LAC at d3[mmol/L, M (Q1, Q3)] | 1.6[1.28-2.1] | 1.5[1.1-1.75] | 1.9[1.45-4.2] | **0.026** |
| **Biomarkers of cardiac function** |  |  |  |  |
| BNP [pg/ml, M (Q1, Q3)] | 72.15[39.69-197.77] | 80.5[21.19-259.46] | 63.8[41.81-181.65] | 1.000 |
| hsTni [pg/ml, M (Q1, Q3)] | 10.9[2.11-919.12] | 11.91[1.21-2248.36] | 9.88[3.28-778.58] | 0.960 |
| **Biomarkers of hepatic function** |  |  |  |  |
| ALT [U/L, M (Q1, Q3)] | 39.5[14-77.75] | 41[14-65.5] | 28[16-118.5] | 0.840 |
| AST [U/L, M (Q1, Q3)] | 46[20-132.75] | 63[17.5-167] | 41[21-101] | 0.579 |
| AST/ALT [M (Q1, Q3)] | 1.38[1.07-2.04] | 1.62[1.12-2.66] | 1.37[0.81-1.82] | 0.139 |
| Albumin [g/L, M (Q1, Q3)] | 30.7[27.72-33] | 31.2[27.75-34.35] | 30[27.55-32.25] | 0.545 |
| Albumin/globulin [M (Q1, Q3)] | 1.33[1.26-1.51] | 1.37[1.28-1.51] | 1.33[1.15-1.58] | 0.880 |
| TBIL [µmol/L, M (Q1, Q3)] | 10.6[7.88-15.88] | 8.4[6.8-10.6] | 13.7[10.4-22.55] | **0.005** |
| DBIL [µmol/L, M (Q1, Q3)] | 6.4[3.72-11.23] | 5.1[3.15-6.4] | 9.6[5.65-13.15] | **0.039** |
| **Biomarkers of renal function** |  |  |  |  |
| CR [µmol/L, M (Q1, Q3)] | 70.5[52.75-91.75] | 68[49-90.5] | 55.5[77-101] | 0.801 |
| Uric acid [µmol/L, M (Q1, Q3)] | 254[191.75-322.75] | 299[214.5-336.5] | 248[159.5-273] | 0.153 |
| Urea nitrogen [mmol/L, M (Q1, Q3)] | 7.15[6.05-10.2] | 7.8[5.25-11.85] | 7[6-9.3] | 0.545 |
| Cystatin C [mg/L, M (Q1, Q3)] | 1.31[1.14-1.73] | 1.25[0.91-1.8] | 1.42[1.17-1.69] | 0.511 |
| **Biomarkers of coagulation function** |  |  |  |  |
| INR [M (Q1, Q3)] | 1.14[1.03-1.23] | 1.15[1.04-1.21] | 1.12[1.01-1.58] | 0.687 |
| APTT [sec, M (Q1, Q3)] | 28.7[24.48-38.03] | 28.6[25.15-31.55] | 33.9[21.1-51.5] | 0.479 |
| FIB [g/L, M (Q1, Q3)] | 3.1[1.52-4] | 3.16[1.75-4.33] | 3.1[1.5-3.97] | 0.511 |
| D-dimer [ng/ml, M (Q1, Q3)] | 3453.11[1434.14-8580.9] | 2047.32[1142.88-5210.5] | 6423.93[1743.92-10000] | 0.064 |

**Note:** Bold p‑values indicate statistically significant differences between groups (p<0.05).

**Abbreviations:** SBP: Systolic blood pressure; DBP: Diastolic blood pressure; HR: Heart rate; N%: Percentage of neutrophils; ALT: Alanine transaminase; AST: Aspartate transaminase; TBIL: Total bilirubin; DBIL: Direct bilirubin; CR: Creatinine; PCT: Procalcitonin; CRP: C-reactive protein; LAC: Lactic acid; BNP: Type B atrial brain natriuretic peptide; hsTni: Highly sensitive troponin; APTT: Activated partial thromboplastin time; INR: International normalized ratio; FIB: Fibrinogen

**Table S3: Treatments and Outcomes of Grade 4 irAEs at ICU**

|  | All irAEs（n=26） | Survivors（n=13） | Non-Survivors（n=13） | *p* |
| --- | --- | --- | --- | --- |
| **Treatments** |  |  |  |  |
| **Oxygen therapy** |  |  |  |  |
| Nasal catheter oxygen inhalation (n, %) | 8(30.8%) | 6(46.15%) | 2(15.38%) | **0.005** |
| High flow rate humidification (n, %) | 4(15.4%) | 3(23.08%) | 1(7.69%) | 0.539 |
| Mechanical ventilation (n, %) | 14(53.8%) | 3(23.08%) | 11(84.62%) | **0.002** |
| FiO2 [%, M (Q1, Q3)] | 40[29-100] | 29[29-40] | 100[40-100] | **0.002** |
| **Medication** |  |  |  |  |
| Vasopressor therapy (n, %) | 17(65.4%) | 4(38.46%) | 13(100.00%) | **0.000** |
| Immunoglobulin therapy (n, %) | 10(38.5%) | 6(46.15%) | 4(38.46%) | 0.510 |
| Mycophenolate mofetil therapy (n, %) | 8(30.8%) | 5(38.46%) | 3(23.08%) | 0.395 |
| **Others** |  |  |  |  |
| TPE (n, %) | 2(7.7%) | 1(7.69%) | 1(7.69%) | 1.000 |
| RRT (n, %) | 2(7.7%) | 2(15.38%) | 0 | 0.141 |
| Sepsis (n, %) | 16(61.5%) | 6(46.15%) | 10(76.92%) | 0.107 |

**Note:** Bold p‑values indicate statistically significant differences between groups (p<0.05).

**Abbreviations:** FiO2: Fraction of inspiration O2; TPE: therapeutic plasma exchange; RRT: renal replacement therapy

**Table S4: Complete SHAP Result and Rank**

| Features | SVM | | RF | | LR | | Mean | |
| --- | --- | --- | --- | --- | --- | --- | --- | --- |
| SHAP | Rank | SHAP | Rank | SHAP | Rank | SHAP | Rank |
| Age | 0.014858 | 7 | 0.006211 | 26 | 0.107786 | 8 | 0.382187 | 10 |
| Albumin | 0.009544 | 16 | 0.002961 | 41 | 0.048089 | 41 | 0.183039 | 34 |
| Albumin/globulin | 0.001371 | 51 | 0 | 68 | 0.032106 | 53 | 0.080109 | 56 |
| Allergy | 0 | 63 | 0 | 57 | 0.01376 | 67 | 0.019022 | 71 |
| ALT | 0 | 68 | 0.002145 | 46 | 0.008802 | 68 | 0.022772 | 69 |
| Anthracyclines | 0.010216 | 13 | 0 | 54 | 0.08343 | 19 | 0.264341 | 21 |
| APTT | 0 | 72 | 0.007551 | 24 | 0.027959 | 58 | 0.088891 | 52 |
| AST | 0.001544 | 46 | 0 | 67 | 0.031483 | 55 | 0.050758 | 64 |
| AST/ALT | 0.006776 | 22 | 0 | 69 | 0.076794 | 25 | 0.1991 | 30 |
| Basophil | 0 | 70 | 0.002521 | 44 | 0.029136 | 56 | 0.061395 | 62 |
| BE | 0.005671 | 28 | 0.003387 | 37 | 0.073694 | 26 | 0.197131 | 31 |
| BMI | 0.030218 | 2 | 0.02274 | 7 | 0.147809 | 4 | 0.726236 | 2 |
| BNP | 0.001482 | 49 | 0.007529 | 25 | 0.034859 | 50 | 0.118184 | 46 |
| Chemotherapy | 0 | 62 | 0 | 58 | 0.00818 | 69 | 0.026743 | 68 |
| Core temperature | 0.002736 | 40 | 0 | 51 | 0.051701 | 37 | 0.129228 | 41 |
| CR | 0.000658 | 54 | 0.003675 | 36 | 0.024441 | 59 | 0.068178 | 59 |
| CRP | 0 | 66 | 0.008647 | 21 | 0.022477 | 64 | 0.085528 | 53 |
| Cystatin C | 0 | 71 | 0 | 71 | 0.00477 | 72 | 0.002924 | 73 |
| DBIL | 0.002131 | 44 | 0.024841 | 6 | 0.038244 | 46 | 0.231516 | 24 |
| DBP | 0.005811 | 27 | 0.010143 | 18 | 0.100509 | 10 | 0.293513 | 14 |
| D-dimer | 0.010333 | 12 | 0 | 73 | 0.102747 | 9 | 0.282181 | 15 |
| Dermatologic toxicities | 0 | 57 | 0.005521 | 29 | 0.055768 | 33 | 0.12674 | 43 |
| Drinking | 0.013428 | 9 | 0 | 48 | 0.079522 | 23 | 0.276044 | 17 |
| Eosinophils | 0.008271 | 19 | 0 | 60 | 0.048061 | 42 | 0.201082 | 29 |
| Ferritin | 0 | 67 | 0.002512 | 45 | 0.033614 | 51 | 0.069359 | 58 |
| FIB | 0.008345 | 18 | 0.003223 | 38 | 0.050024 | 38 | 0.188272 | 32 |
| FiO2 | 0 | 58 | 0.016987 | 11 | 0.071045 | 27 | 0.221587 | 27 |
| Height | 0.006165 | 24 | 0.021247 | 10 | 0.087142 | 17 | 0.330563 | 13 |
| Hemoglobin | 0.004475 | 33 | 0 | 63 | 0.053371 | 36 | 0.127343 | 42 |
| HR | 0.004881 | 32 | 0 | 66 | 0.049959 | 39 | 0.12022 | 45 |
| hsTNi | 0.008657 | 17 | 0.00396 | 35 | 0.066357 | 29 | 0.229068 | 26 |
| Hypertension | 0.002684 | 42 | 0 | 56 | 0.037631 | 47 | 0.084838 | 54 |
| Immunoglobulin therapy | 0 | 73 | 0 | 74 | 0.024132 | 61 | 0.040653 | 66 |
| INR | 0.00152 | 47 | 0.004417 | 33 | 0.024205 | 60 | 0.076983 | 57 |
| LAC1 | 0.027918 | 3 | 0.02758 | 5 | 0.150429 | 3 | 0.717995 | 3 |
| LAC2 | 0.006972 | 21 | 0.048135 | 2 | 0.08356 | 18 | 0.495608 | 5 |
| LAC3 | 0.00505 | 31 | 0.012019 | 14 | 0.067898 | 28 | 0.245041 | 22 |
| Leucocytes | 0.010974 | 11 | 0 | 62 | 0.080884 | 22 | 0.272219 | 19 |
| Mycophenolate mofetil therapy | 0 | 74 | 0.00205 | 47 | 0.006326 | 71 | 0.017781 | 72 |
| Myocarditis | 0 | 56 | 0 | 50 | 0.048002 | 43 | 0.080338 | 55 |
| N% | 0.006457 | 23 | 0.029109 | 4 | 0.097612 | 12 | 0.414971 | 8 |
| N1 | 0.005422 | 29 | 0 | 64 | 0.058286 | 31 | 0.172394 | 35 |
| Neutrophils | 0 | 60 | 0 | 61 | 0.03174 | 54 | 0.051218 | 63 |
| Organ diseases | 0.001161 | 52 | 0 | 55 | 0.091831 | 14 | 0.15882 | 38 |
| Other irAEs | 0.001471 | 50 | 0.004648 | 32 | 0.098649 | 11 | 0.204352 | 28 |
| Oxygen therapy | 0.026098 | 4 | 0.056631 | 1 | 0.16533 | 2 | 0.870819 | 1 |
| Pathological state | 0.009838 | 15 | 0.008921 | 20 | 0.05989 | 30 | 0.239516 | 23 |
| PCO2 | 0.00265 | 43 | 0.015892 | 12 | 0.05546 | 34 | 0.231137 | 25 |
| PCT1 | 0.002698 | 41 | 0.006098 | 27 | 0.029101 | 57 | 0.107863 | 49 |
| PCT2 | 0 | 69 | 0.002559 | 43 | 0.017014 | 65 | 0.039913 | 67 |
| pH | 0 | 61 | 0 | 52 | 0.00333 | 74 | 0.000346 | 75 |
| Pneumonia | 0.005189 | 30 | 0.011346 | 16 | 0.141497 | 5 | 0.381385 | 11 |
| PO2 | 0.002003 | 45 | 0.003161 | 39 | 0.007689 | 70 | 0.049591 | 65 |
| Primary tumor site | 0 | 65 | 0 | 59 | 0.014695 | 66 | 0.020698 | 70 |
| PT | 0.001505 | 48 | 0.002581 | 42 | 0.023459 | 63 | 0.064869 | 60 |
| Radiotherapy | 0.003517 | 36 | 0 | 53 | 0.089986 | 15 | 0.160598 | 37 |
| Reason for being transferred to the ICU | 0 | 64 | 0.007644 | 23 | 0.081082 | 21 | 0.184568 | 33 |
| RRT | 0.003213 | 38 | 0.003053 | 40 | 0.048797 | 40 | 0.10882 | 47 |
| SBP | 0.00322 | 37 | 0.011447 | 15 | 0.003137 | 75 | 0.095884 | 51 |
| Sepsis | 0.000329 | 55 | 0 | 72 | 0.032272 | 52 | 0.061592 | 61 |
| Sex | 0.007751 | 20 | 0.005447 | 30 | 0.093857 | 13 | 0.271158 | 20 |
| Smoking | 0.005883 | 26 | 0 | 49 | 0.056975 | 32 | 0.151907 | 39 |
| SpO2 | 0 | 59 | 0.009581 | 19 | 0.046269 | 44 | 0.133629 | 40 |
| Surgical operation condition | 0.009888 | 14 | 0.004136 | 34 | 0.089795 | 16 | 0.27671 | 16 |
| T1 | 0.003576 | 35 | 0.005199 | 31 | 0.036334 | 49 | 0.125036 | 44 |
| T2 | 0.003796 | 34 | 0 | 65 | 0.037569 | 48 | 0.098717 | 50 |
| T3 | 0.000911 | 53 | 0.010148 | 17 | 0.023827 | 62 | 0.108462 | 48 |
| Targeted therapy | 0.013643 | 8 | 0.008465 | 22 | 0.124037 | 7 | 0.408074 | 9 |
| TBIL | 0.002899 | 39 | 0.030938 | 3 | 0.039841 | 45 | 0.273532 | 18 |
| TPE | 0 | 75 | 0 | 75 | 0.004638 | 73 | 0.002688 | 74 |
| Urea | 0.005891 | 25 | 0 | 70 | 0.054608 | 35 | 0.164134 | 36 |
| Uric acid | 0.017019 | 5 | 0.022584 | 8 | 0.082784 | 20 | 0.454831 | 7 |
| Vasopressor therapy | 0.031937 | 1 | 0.005925 | 28 | 0.18929 | 1 | 0.684039 | 4 |
| VEGF-inhibitors | 0.015416 | 6 | 0.022538 | 9 | 0.125522 | 6 | 0.487492 | 6 |
| Weight | 0.012586 | 10 | 0.013944 | 13 | 0.078678 | 24 | 0.336277 | 12 |

**Abbreviations:** ALT: Alanine transaminase; APTT: Activated partial thromboplastin time; AST: Aspartate transaminase; BMI: Body mass index; BNP: Type B atrial brain natriuretic peptide; CR: Creatinine; CRP: C-reactive protein; DBIL: Direct bilirubin; DBP: Diastolic blood pressure; FIB: Fibrinogen; FiO2: Fraction of inspiration O2; HR: Heart rate; hsTni: Highly sensitive troponin; ICI: Immune checkpoint inhibitors; INR: International normalized ratio; LAC: Lactic acid; N%: Percentage of neutrophils; N1: Number of ICI applications before transferring to ICU; PCT: Procalcitonin; RRT: renal replacement therapy; SBP: Systolic blood pressure; T1: Time from first dose ICI to irAEs; T2：Time from first dose ICI to ICU; T3: Time from last dose ICI to ICU; TBIL: Total bilirubin; TPE: therapeutic plasma exchange;
